# Supplementary material for: A Theoretical Study of Hydrogen Abstraction Reactions in Guanosine and Uridine
Source: MDPI journal article supplement (doi:10.3390/ijms24098192), 2023-05-03

Supporting information

to

A theoretical study of hydrogen abstraction reactions in guanosine and uridine

by

Kasper Frølund Schaltz and Stephan P. A. Sauer

Department of Chemistry, University of Copenhagen, DK-2100 Copenhagen Ø,  
Denmark

## Intrinsic Reaction Coordinate plots – Uridine

C1

Forward and reverse:

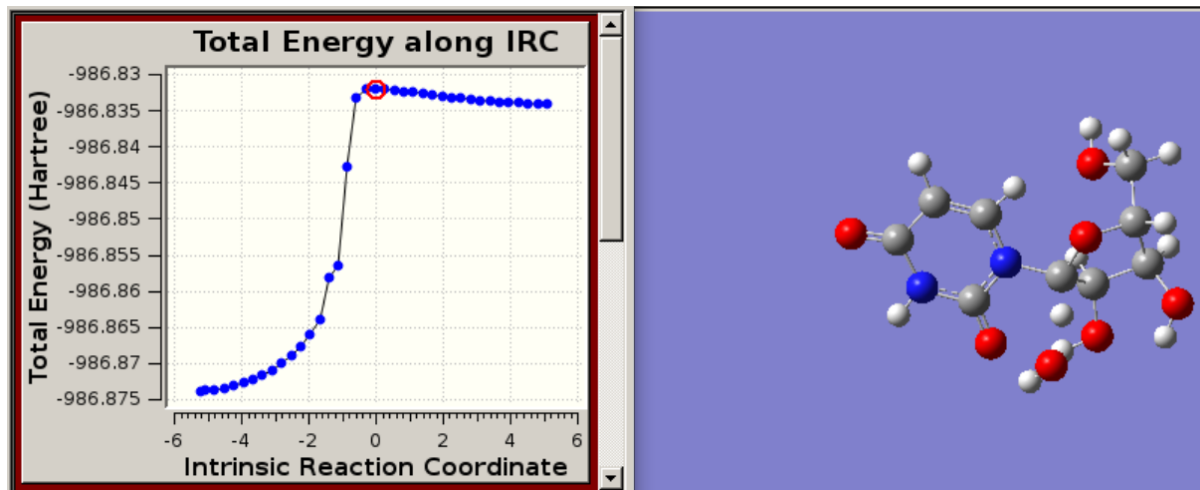

C2

Reverse:

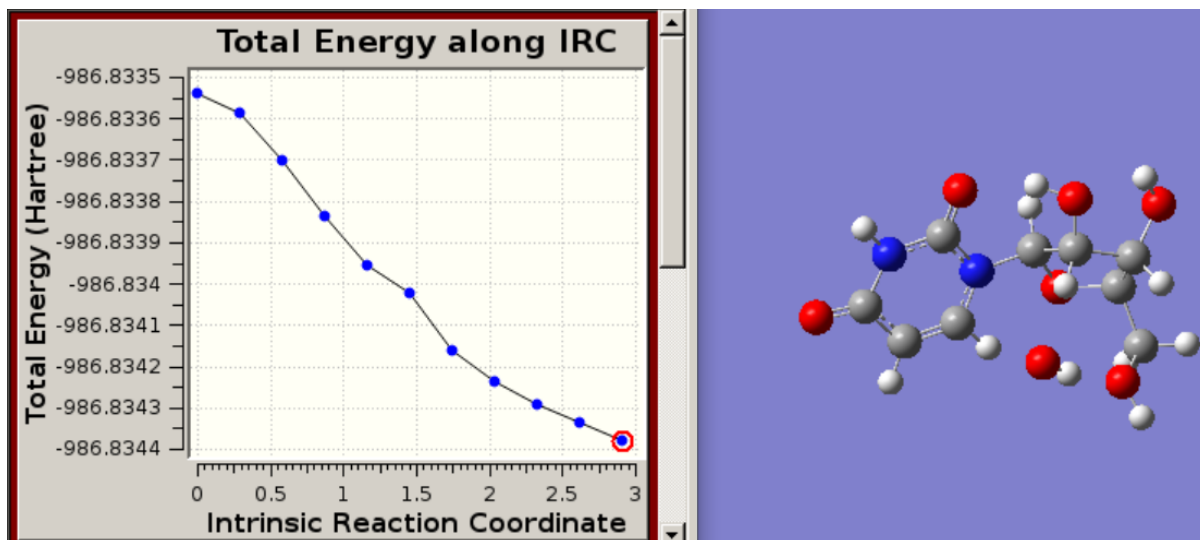

Forward:

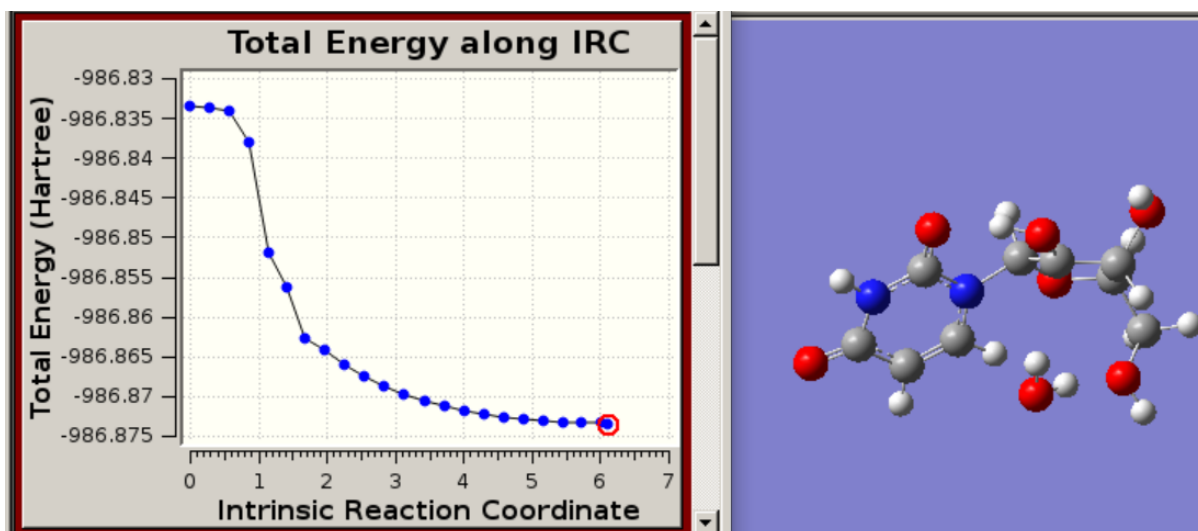

C3

Reverse:

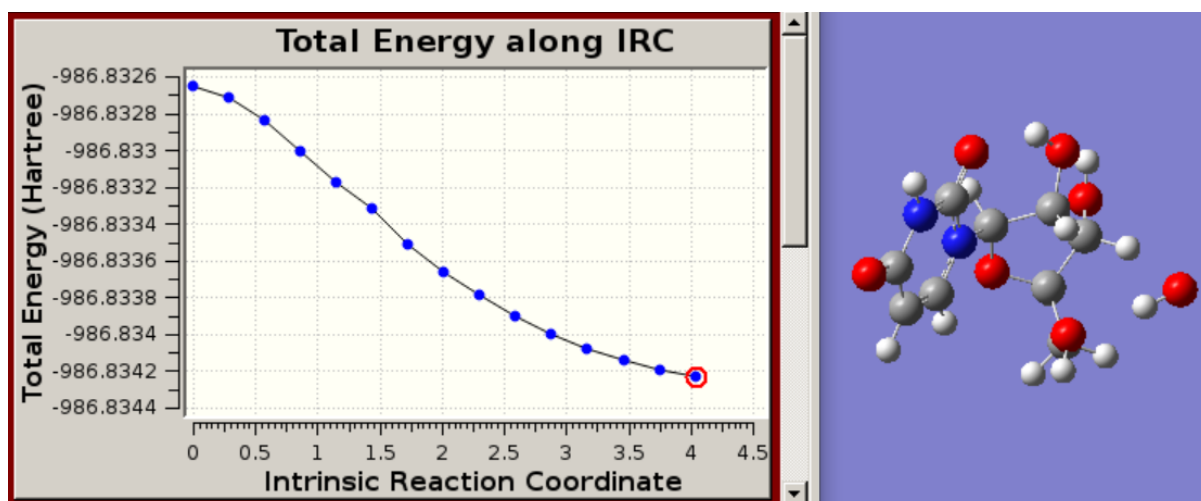

Forward:

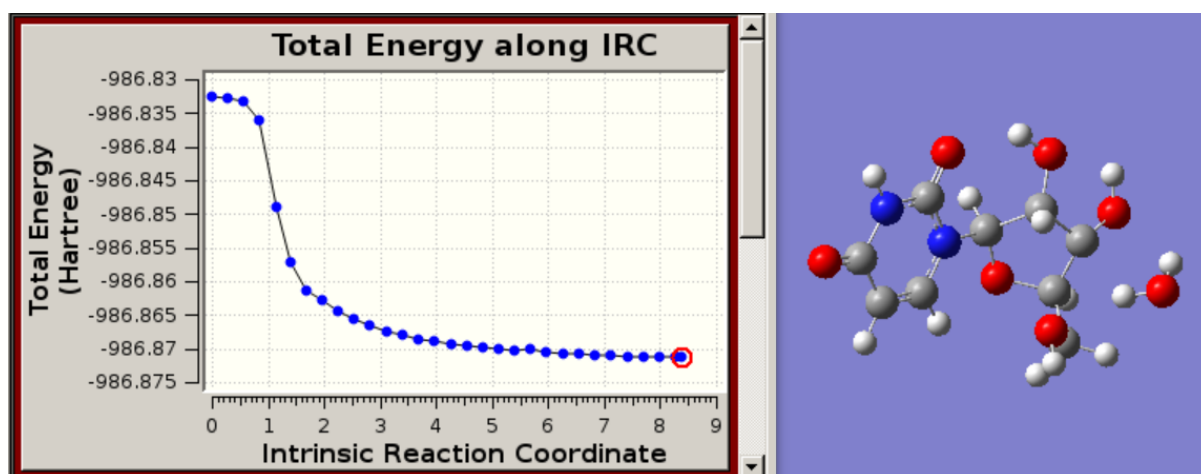

C4

Reverse and forward:

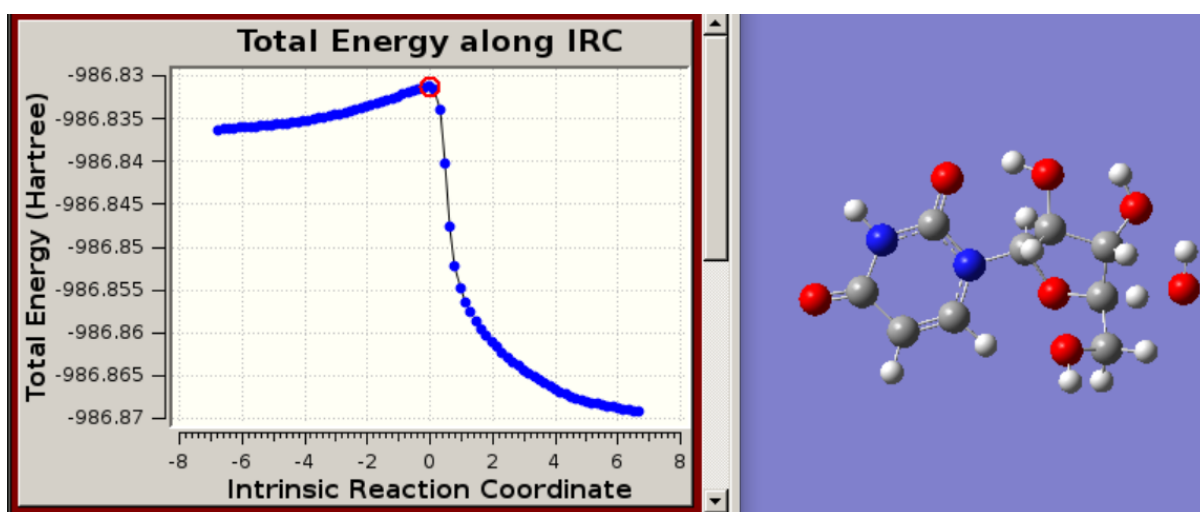

C5\_HO

Forward and reverse:

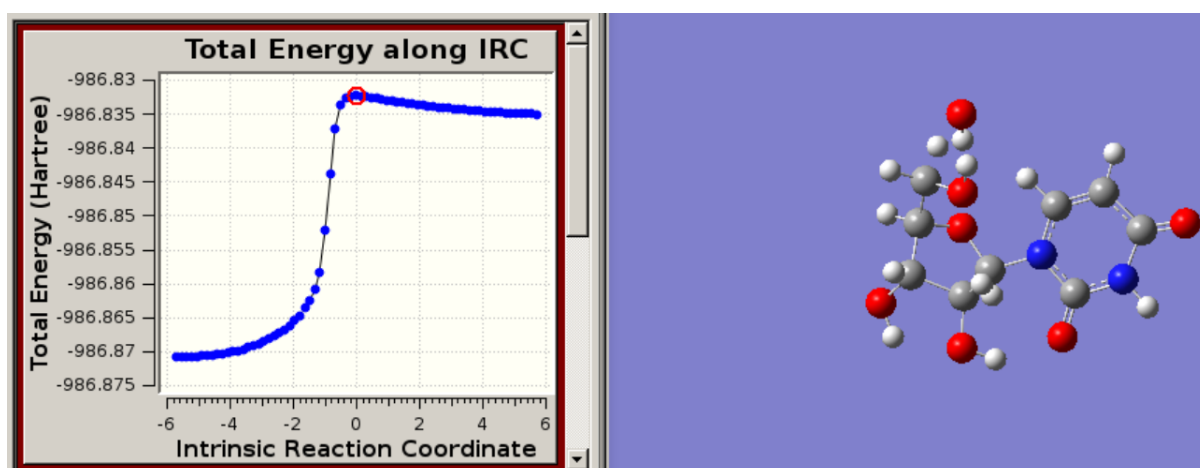

C5\_HC

Forward and reverse

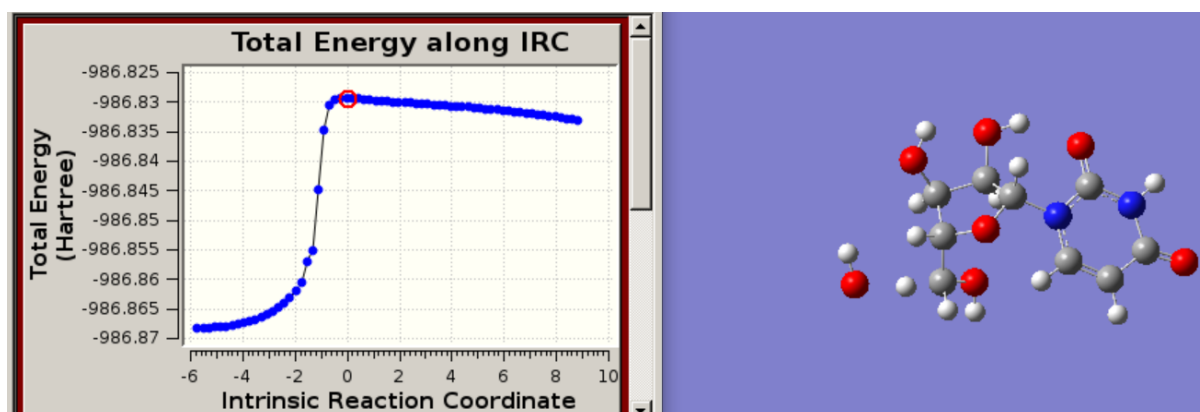

O2

Forward and reverse:

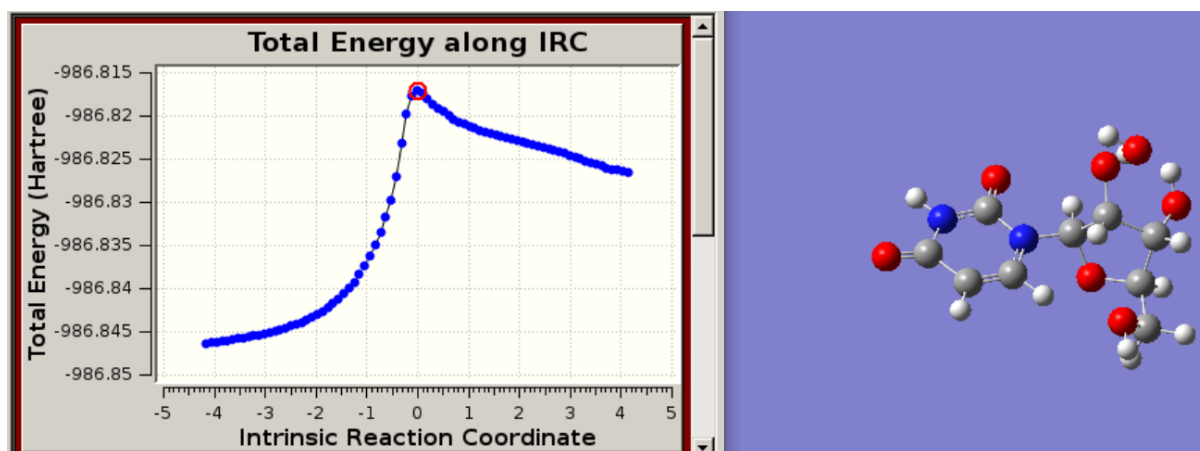

O3

Reverse and forward:

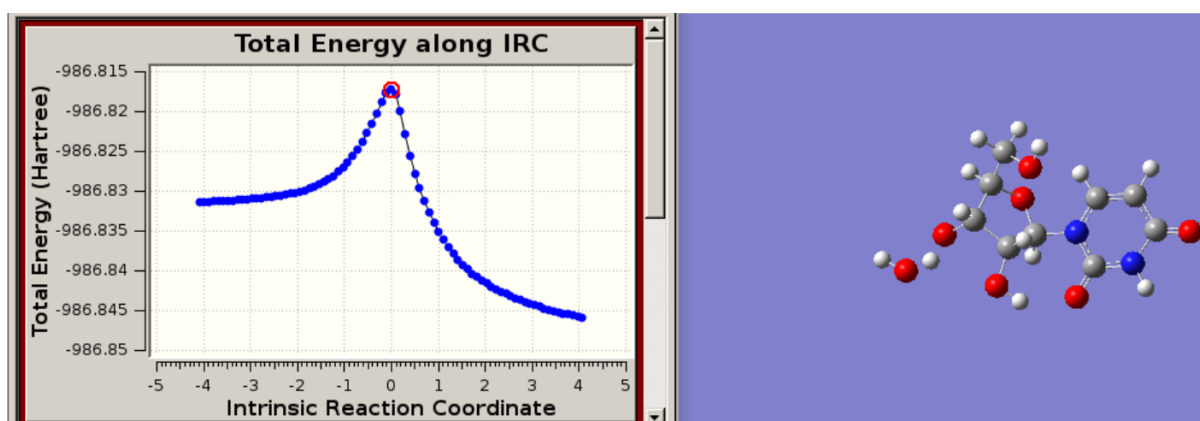

H3

Reverse:

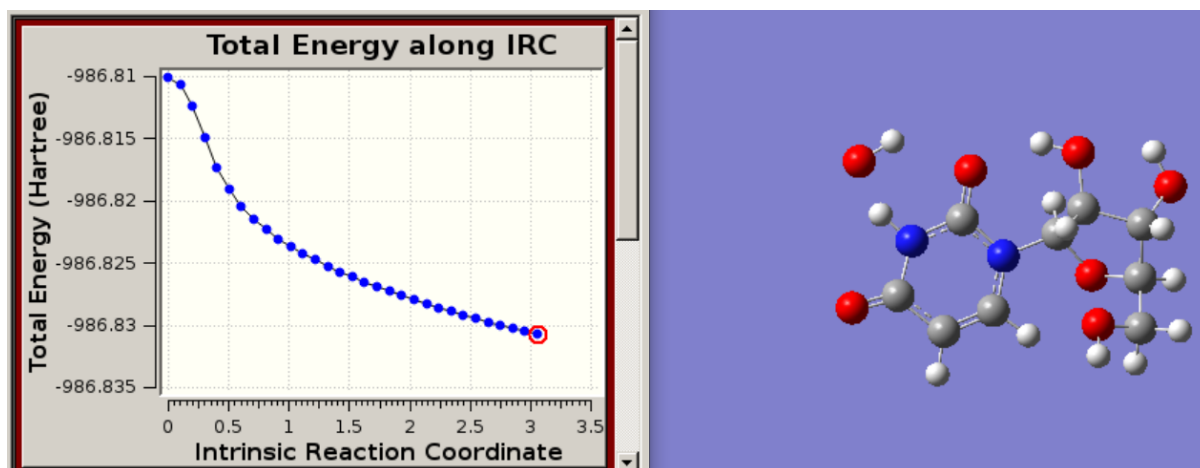

Forward:

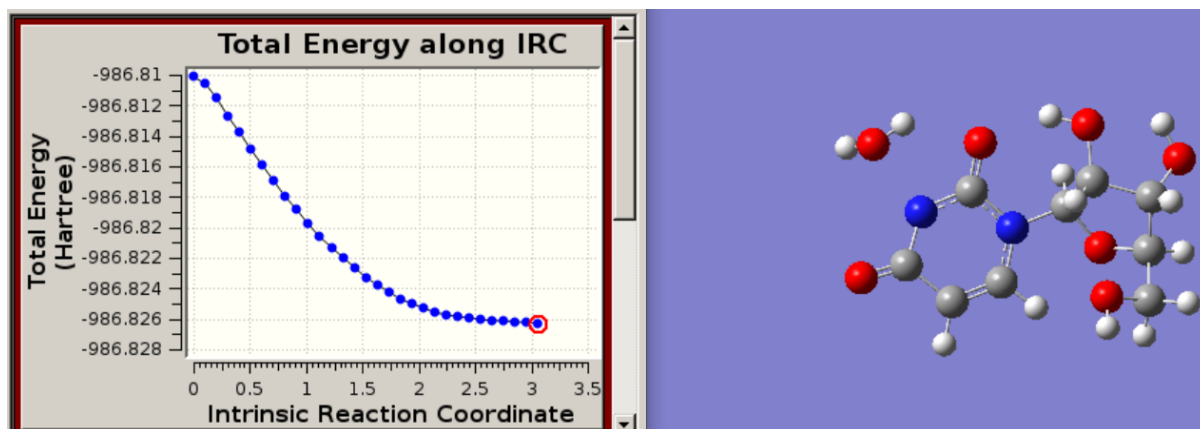

H5

Reverse:

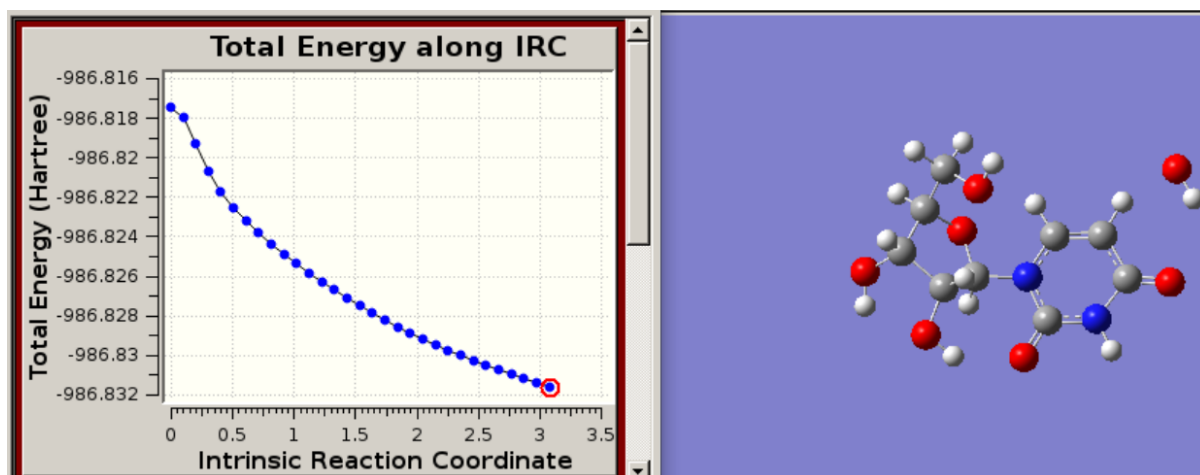

Forward:

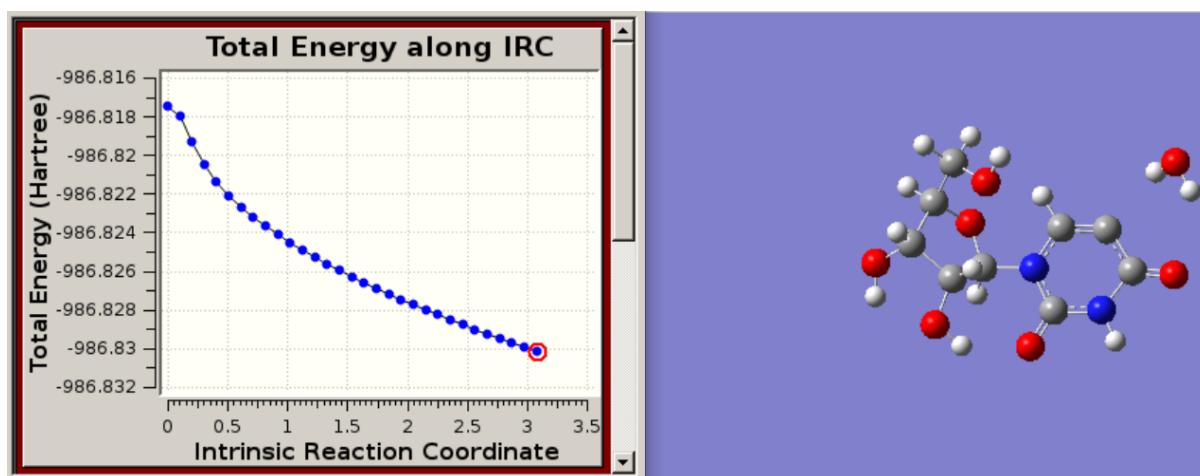

H6

Reverse:

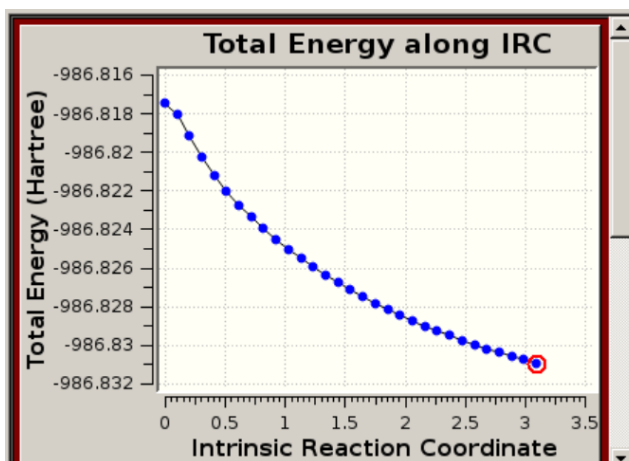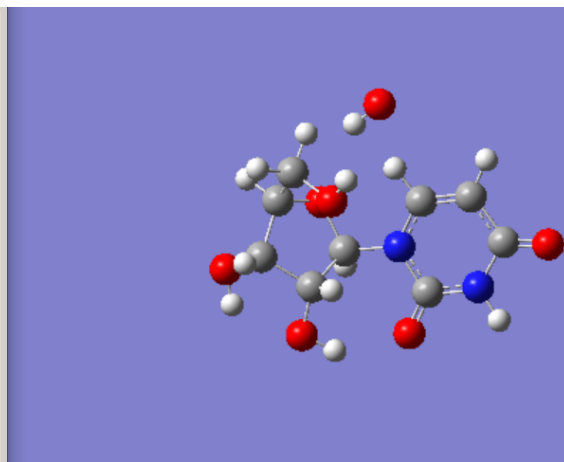

Forward:

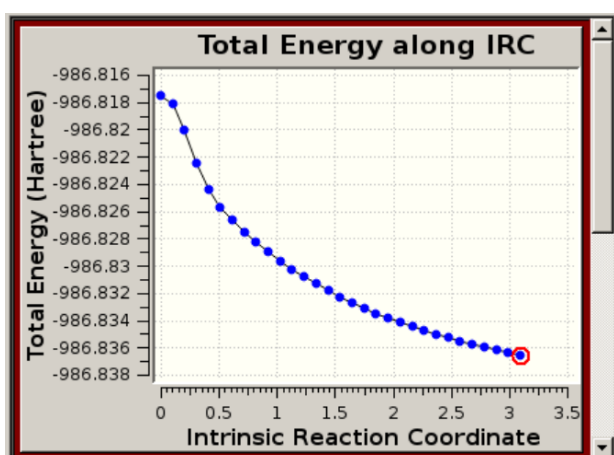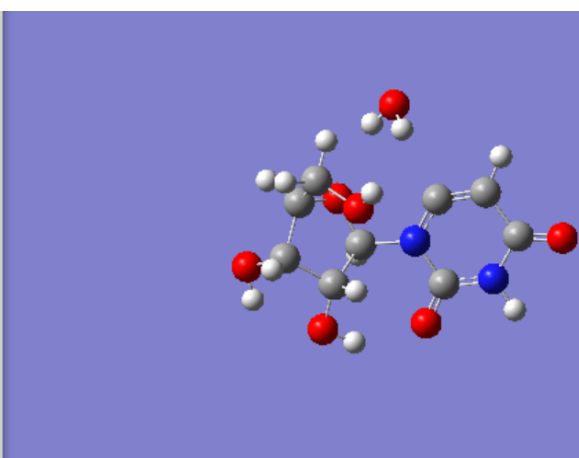

## Intrinsic Reaction Coordinate plots – Guanosine

C1

Reverse:

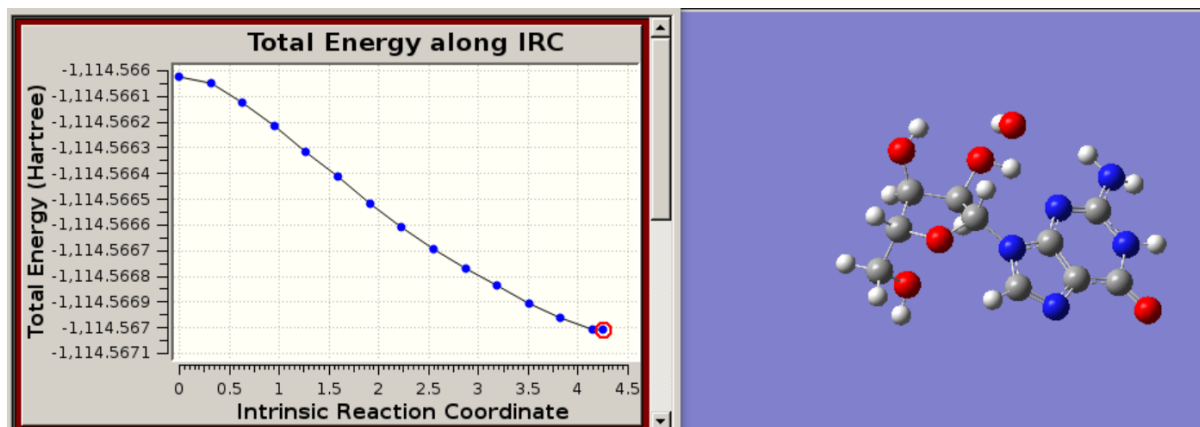

Forward:

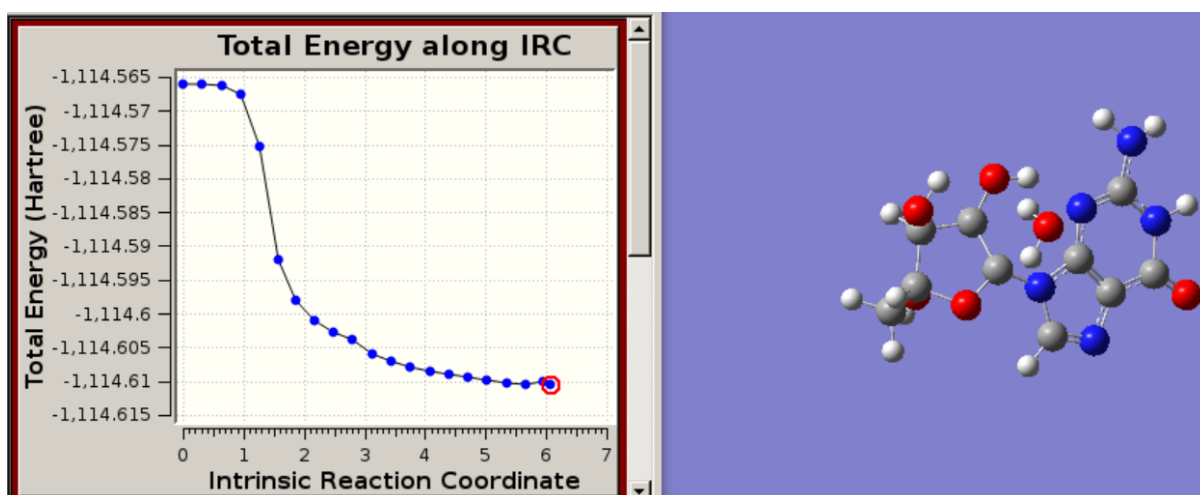

C2

Reverse:



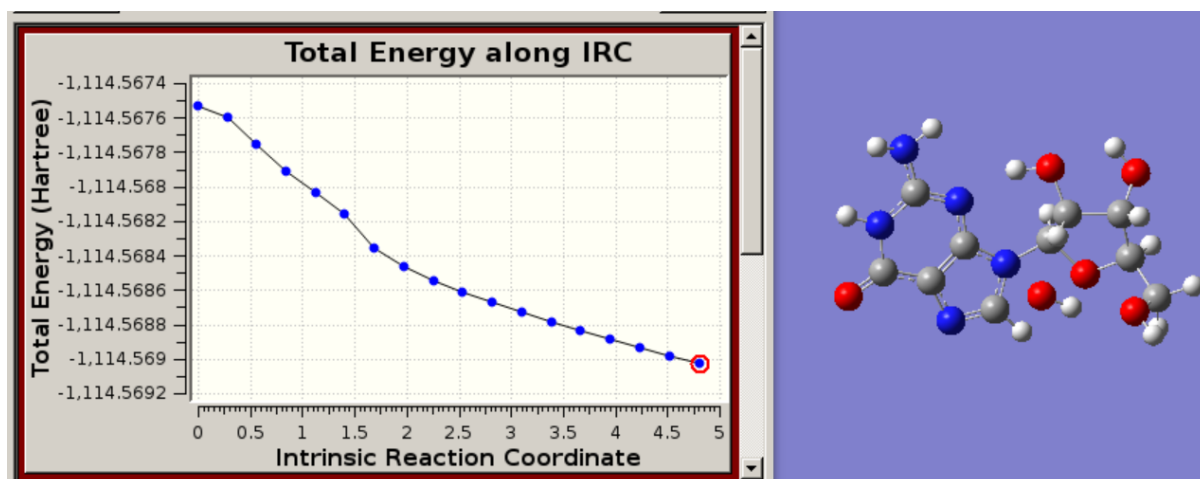

Forward:

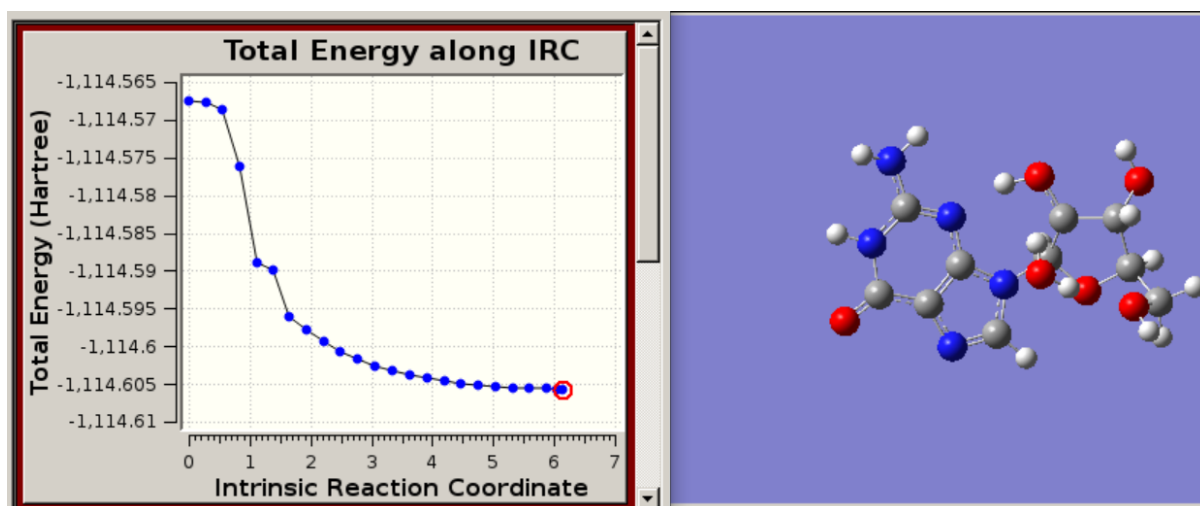

C3

Reverse:

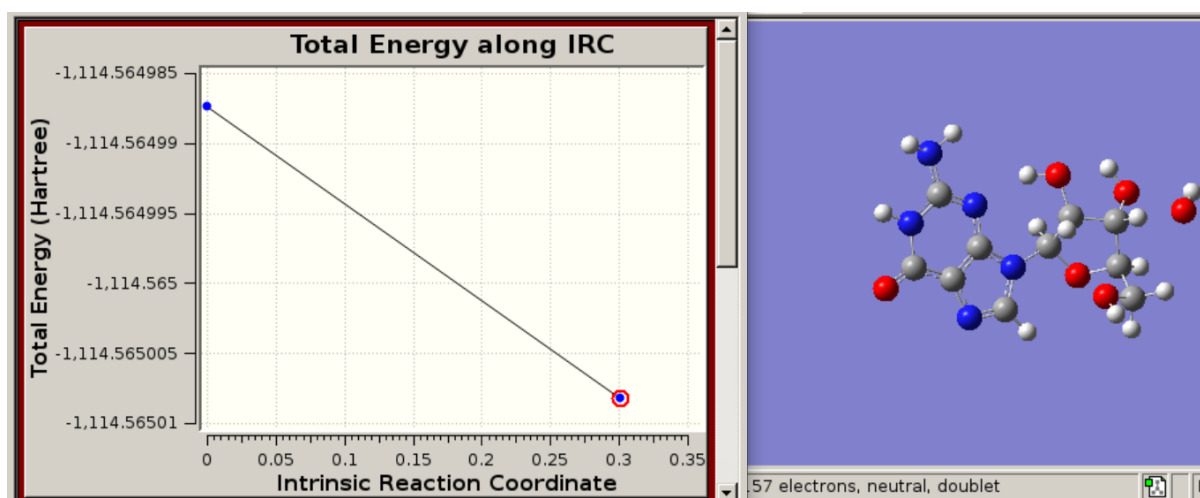

Forward:

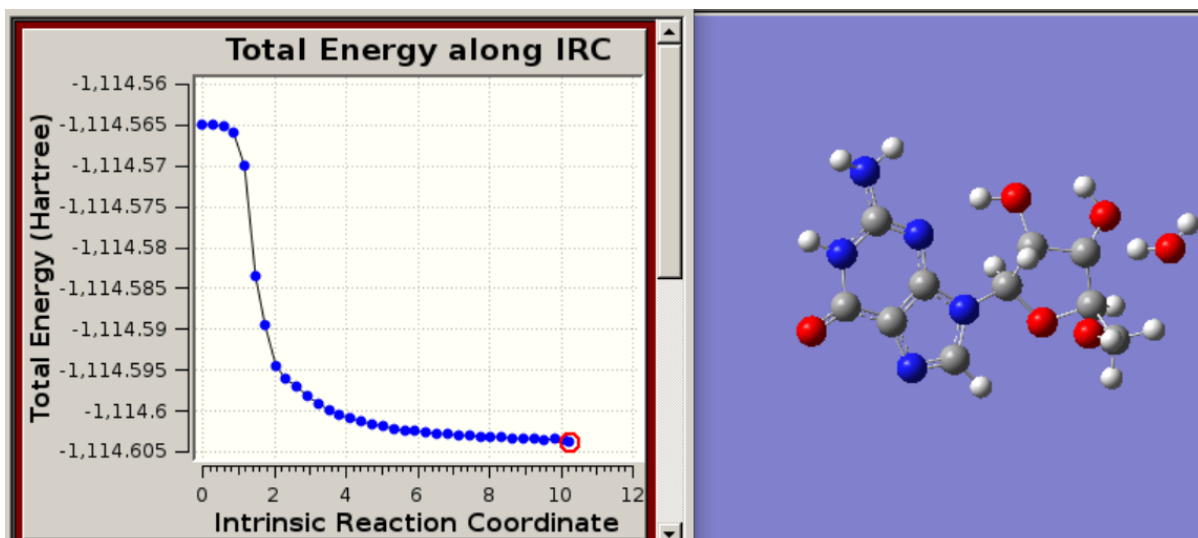

C4

Reverse:

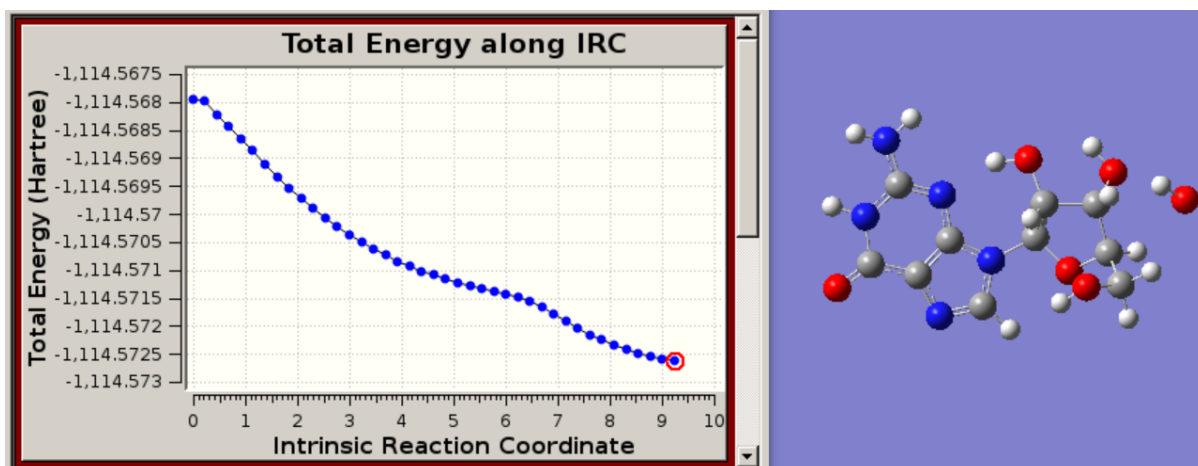

Forward:

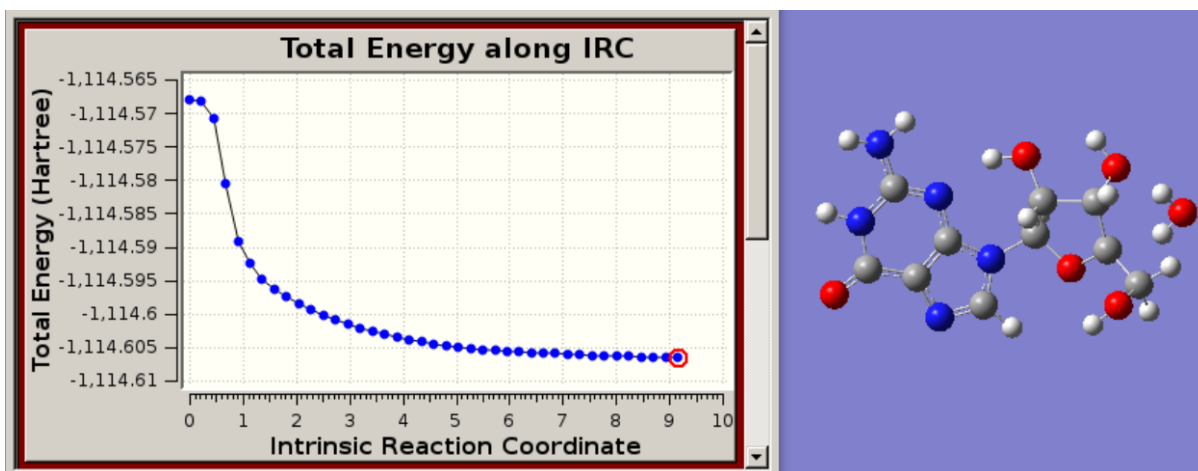

C5\_HC

Reverse:

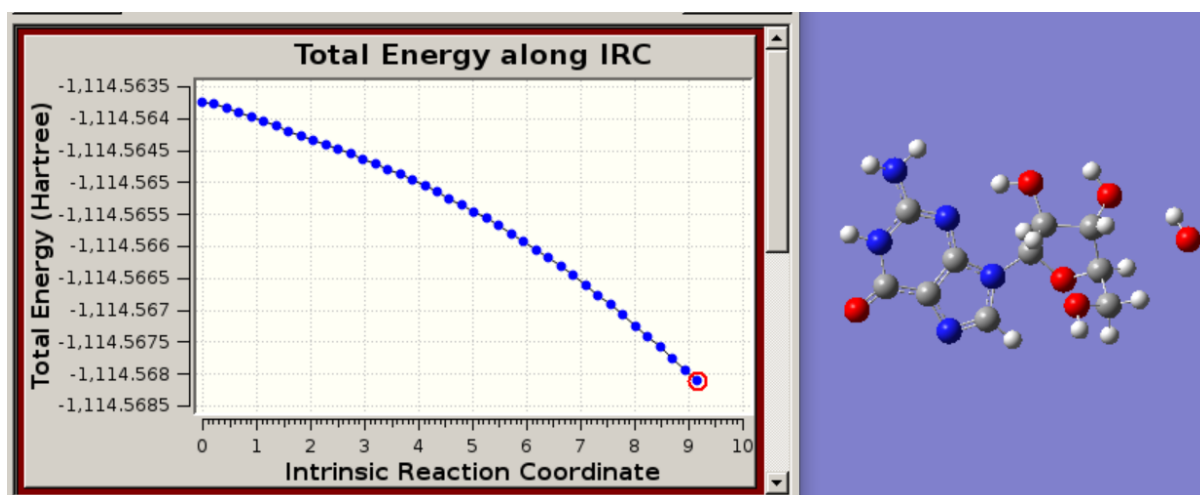

Forward:

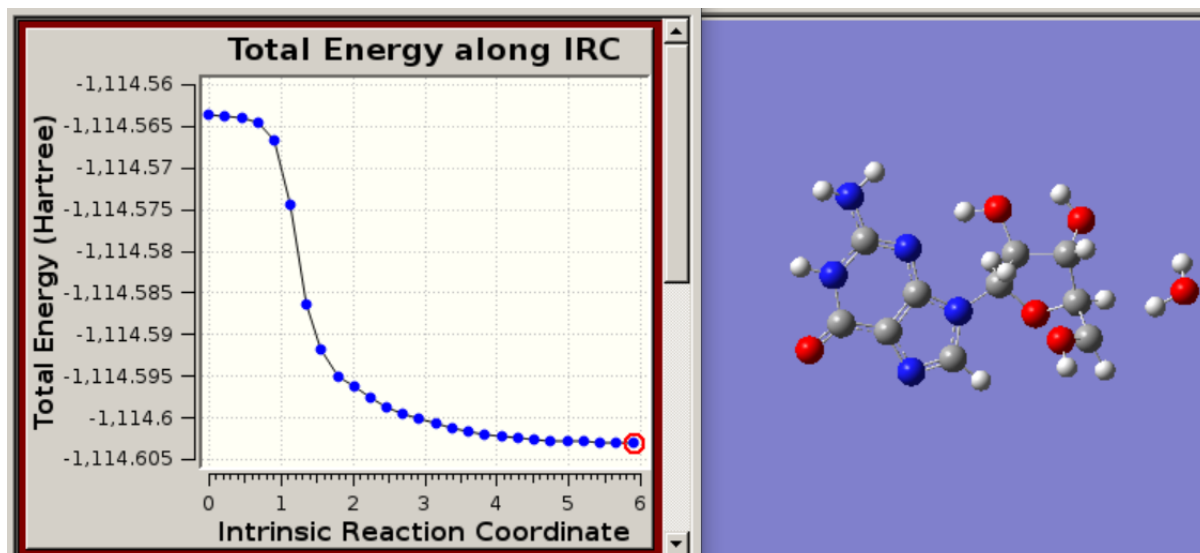

C5\_HO

Reverse:

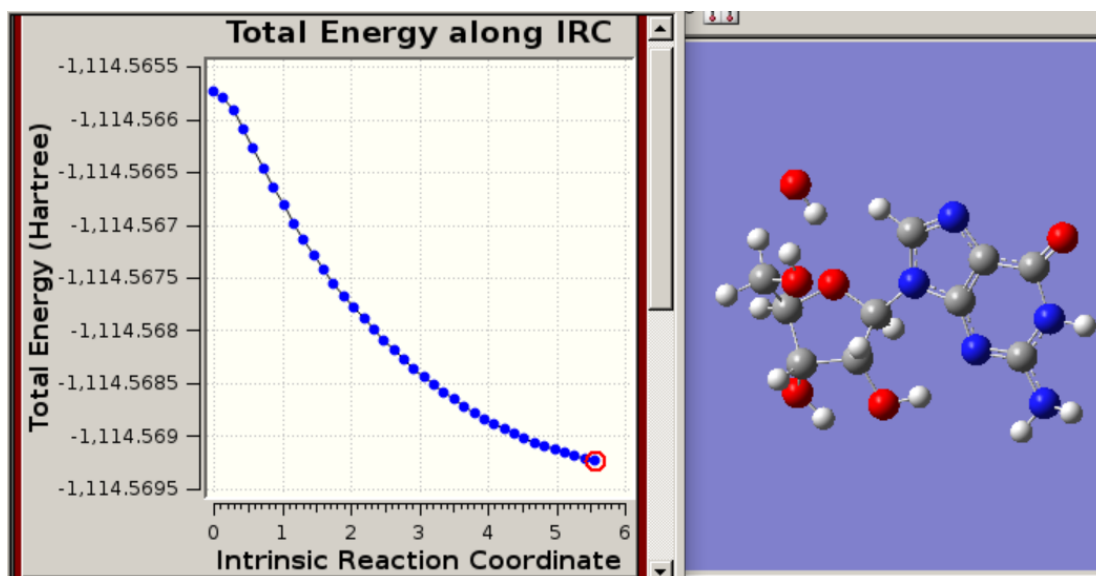

Forward:

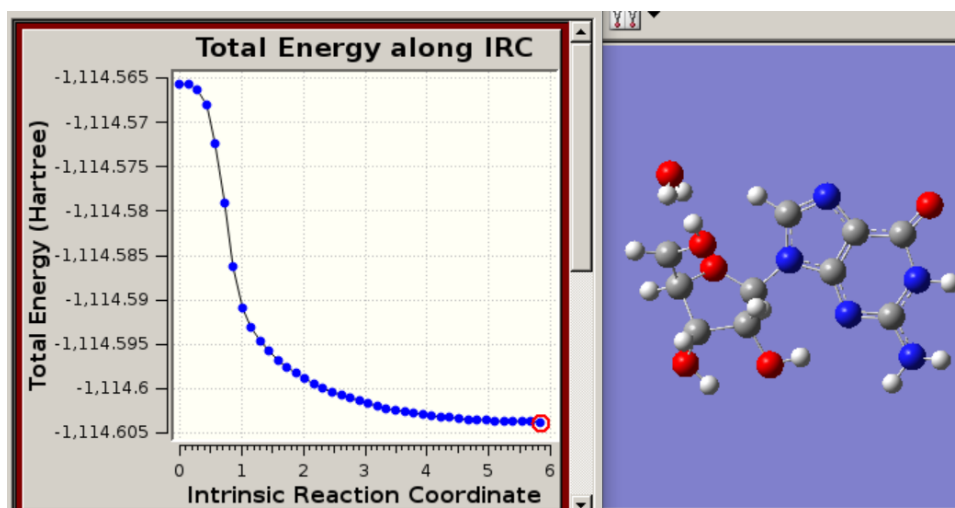

O2

Reverse:

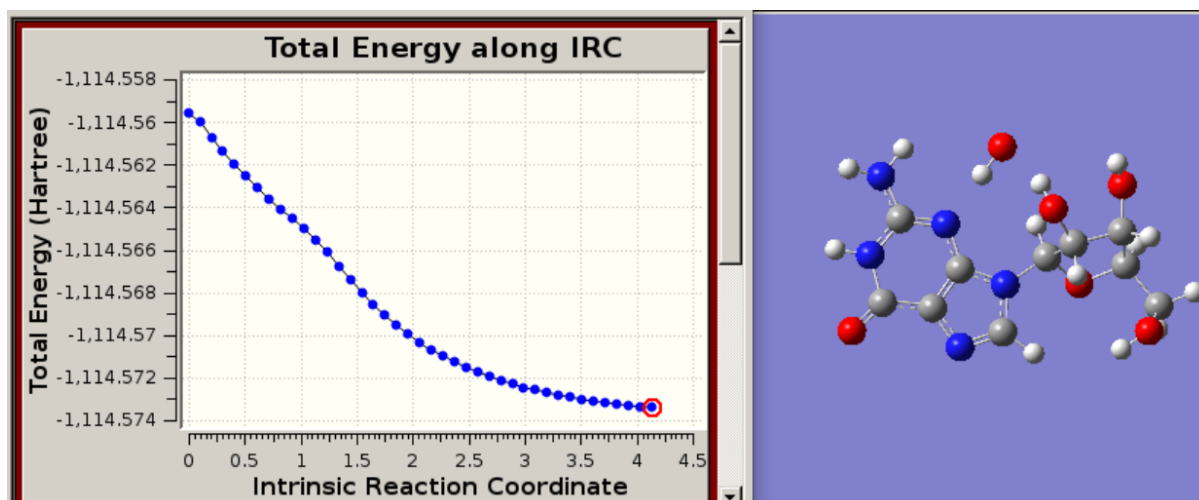

Forward:

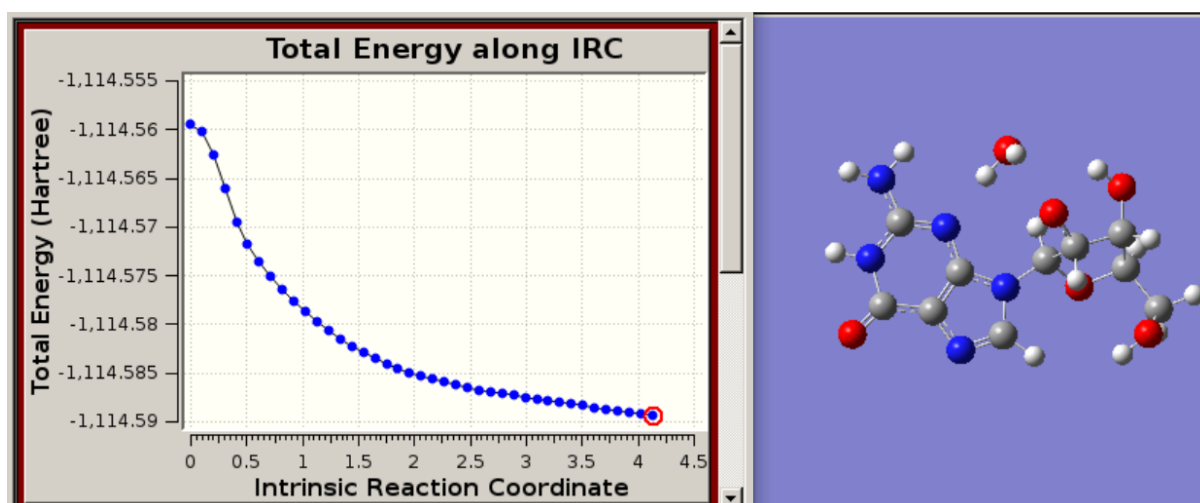

03

Reverse:

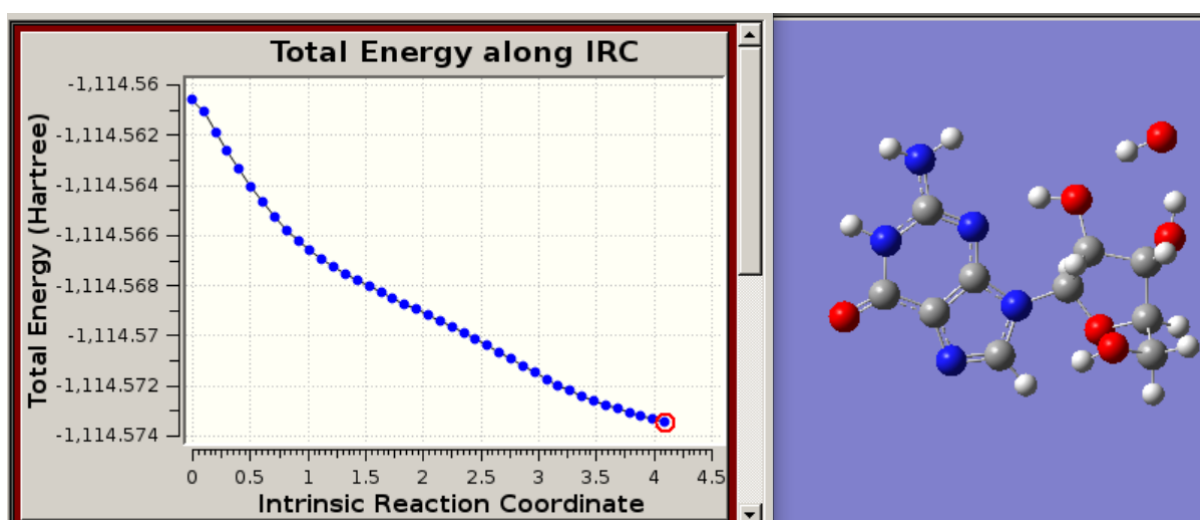

Forward:

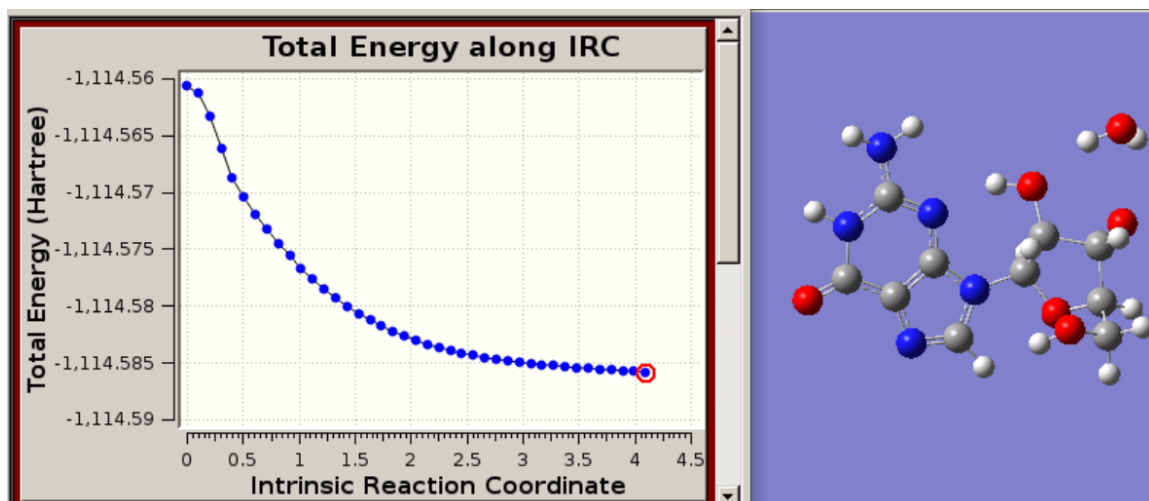

H1

Reverse:

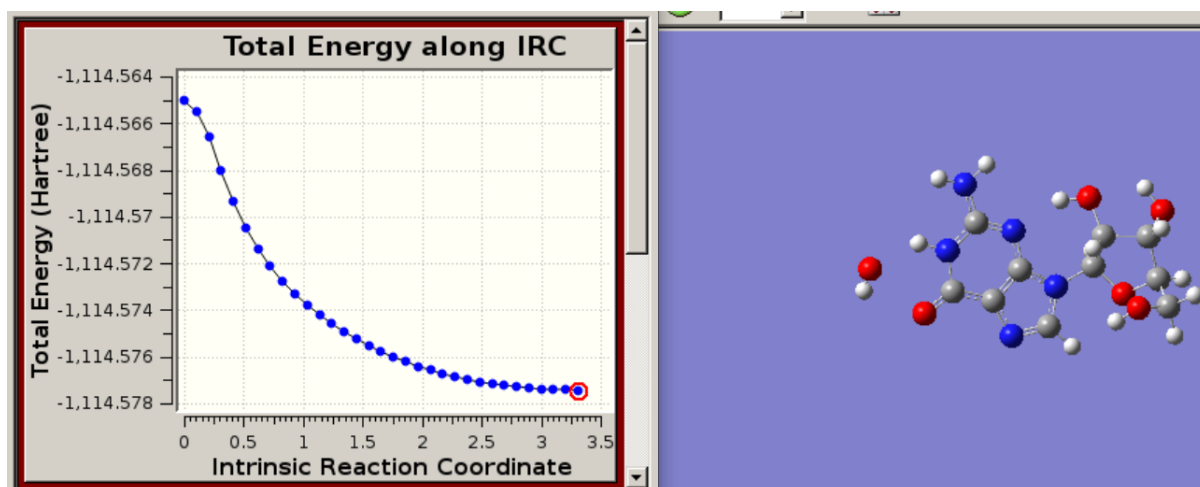

Forward:

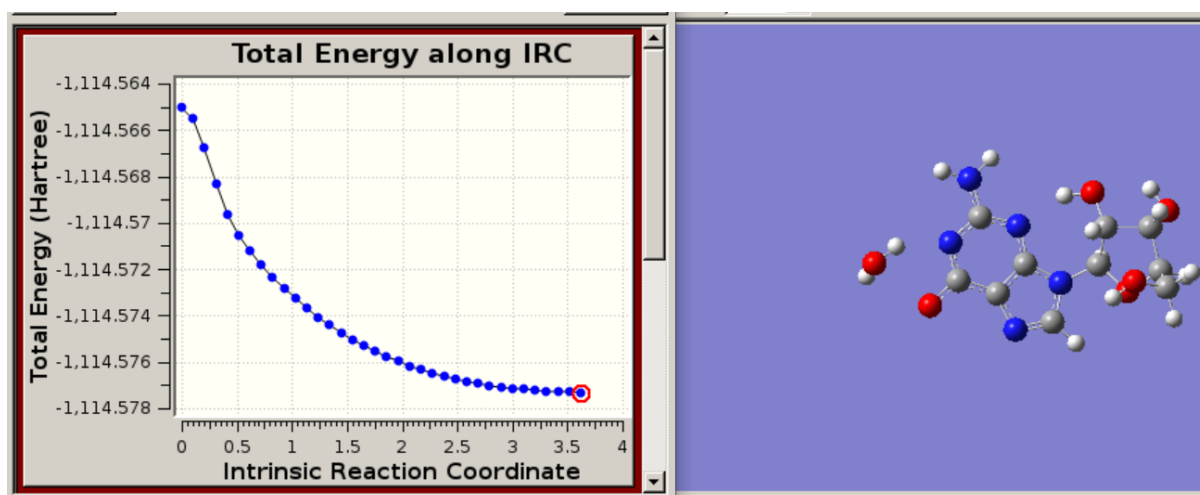

H8

Reverse:

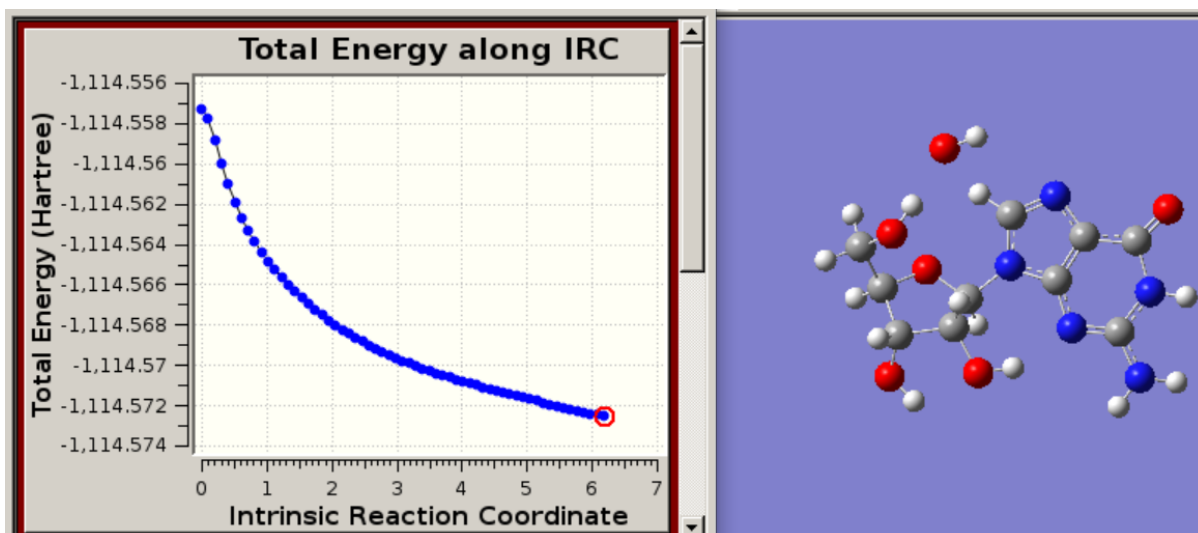

Forward:

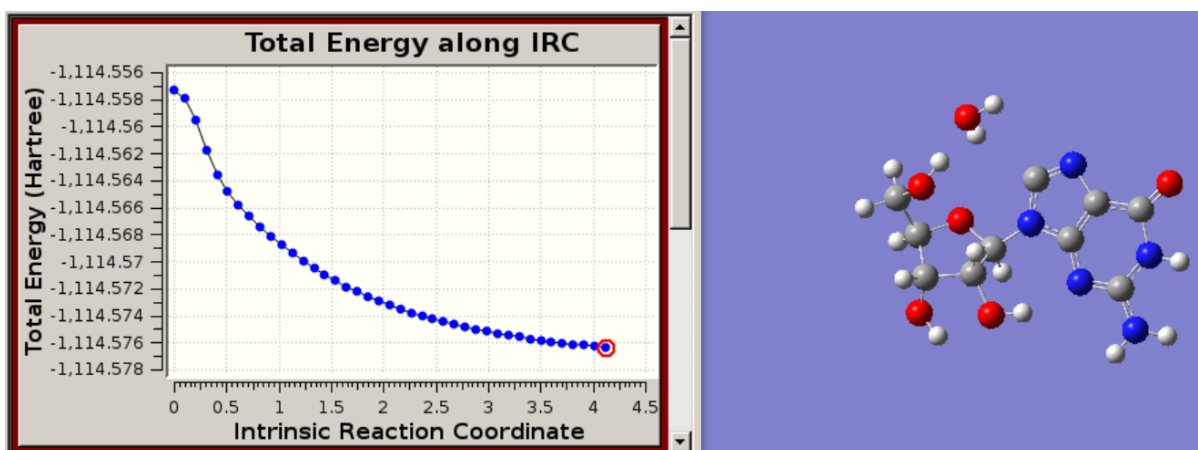

H21

Reverse:

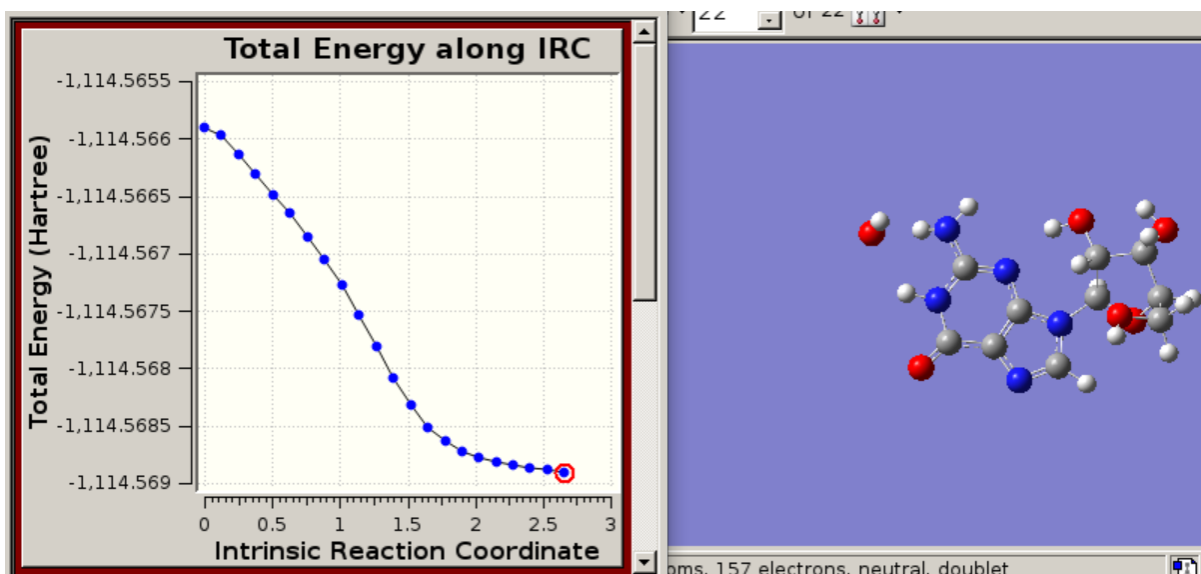

Forward:

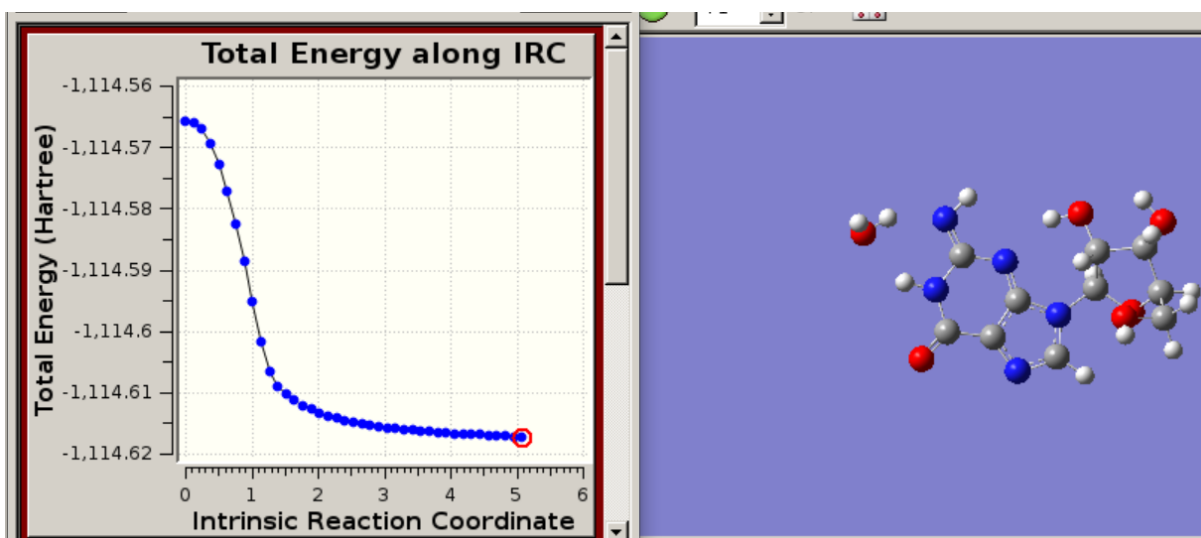

H22

Reverse:



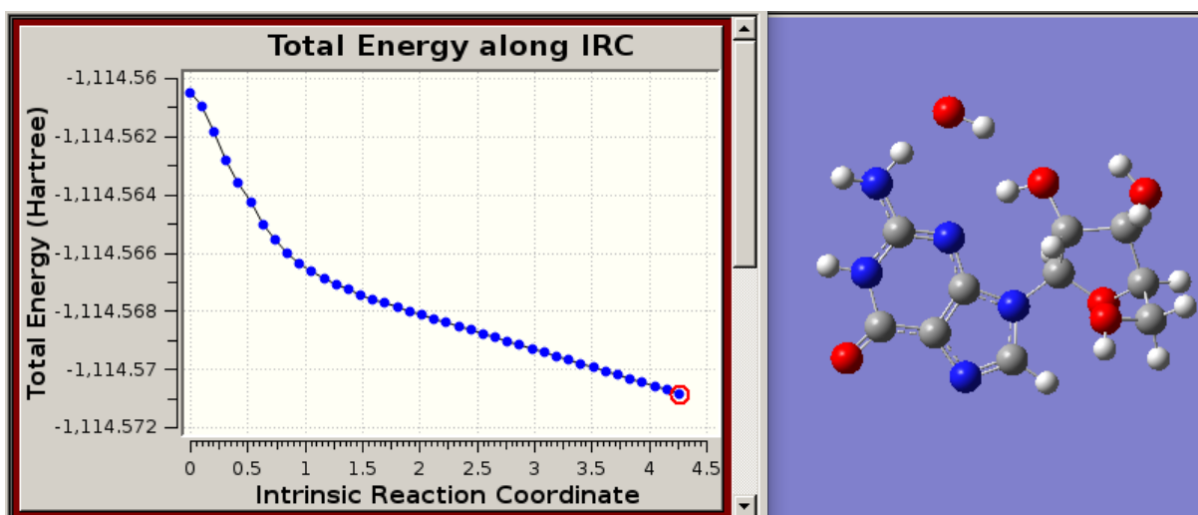

Forward:

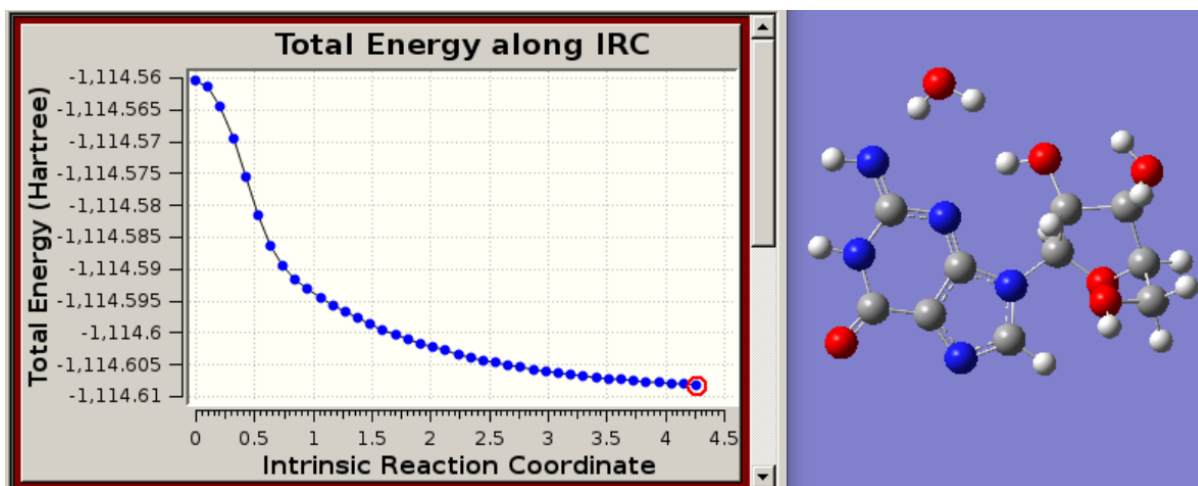

Supplement: s1 [file s1]
